# Supplementary material
Source: publisher site journal article supplement (https://www.dovepress.com/article/322083)
Supplement: Supplementary file 1 [file get_supplementary_file.php]

## **Supplementary Materials**

### **High-throughput screening of mouse gene knockouts identifies established and novel high body fat phenotypes**

David R. Powell<sup>1</sup>, Jean-Pierre Revelli<sup>1</sup>, Deon Doree<sup>1</sup>, Christopher M. DaCosta<sup>1</sup>, Urvi Desai<sup>1</sup>, Melanie K. Shadoan<sup>1</sup>, Lawrence Rodriguez<sup>1</sup>, Michael Mullens<sup>1</sup>, Qi M. Yang<sup>1</sup>, Zhi-Ming Ding<sup>1</sup>, Laura L. Kirkpatrick<sup>1</sup>, Peter Vogel<sup>1</sup>, Brian Zambrowicz<sup>1</sup>, Arthur T. Sands<sup>1</sup>, Kenneth A. Platt<sup>1</sup>, Gwenn M. Hansen<sup>1</sup> and Robert Brommage<sup>1</sup>

<sup>1</sup>Lexicon Pharmaceuticals, Inc., 8800 Technology Forest Place, The Woodlands, TX, 77381, USA

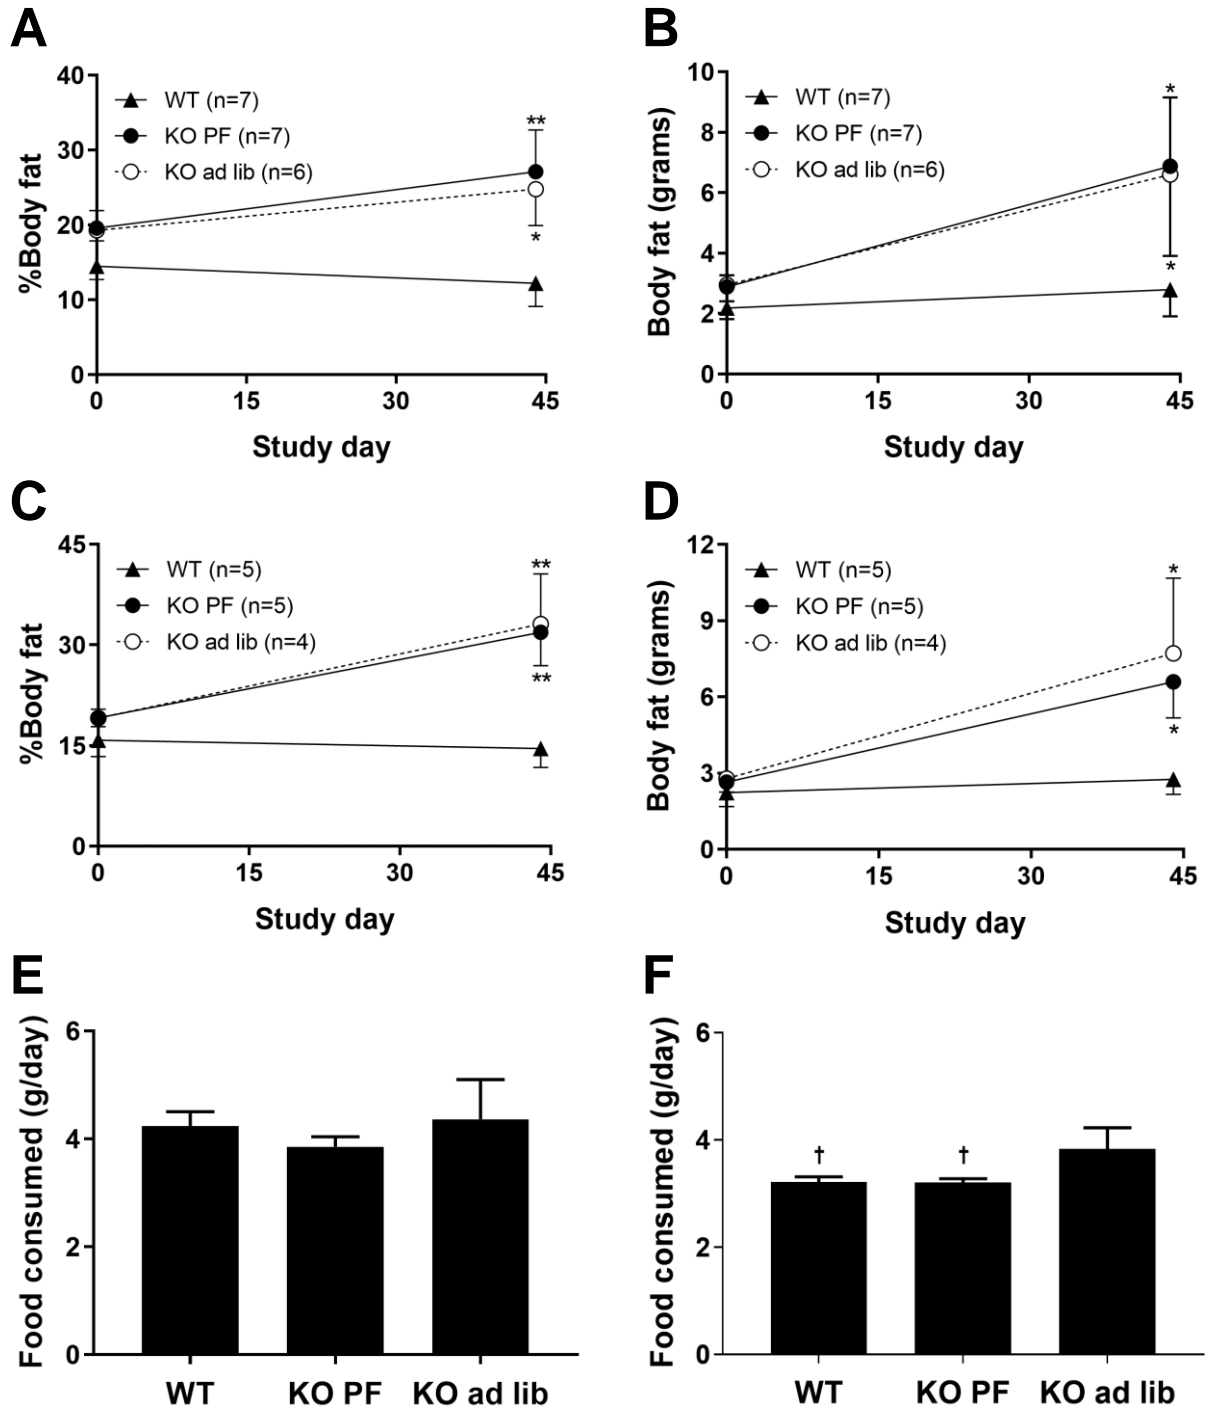

**Supplementary Figure 1. *Gpr45* KO mice are obese due to decreased energy expenditure.** Starting at weaning, 3-week old *Gpr45* KO and WT mice were individually housed for 44 days on chow diet. WT mice were fed ad libitum (ad lib) while KO mice were either fed ad lib (KO ad lib) or pair-fed to the WT mice (KO PF). Body composition was measured by QMR on the first and last study days, with changes in body fat analyzed by one-way ANOVA. Food consumption was measured daily. QMR data are shown for male **A**) %body fat and **B**) body fat (g), and for female **C**) %body fat and **D**) body fat (g). Also shown are mean daily food consumption of **E**) male and **F**) female mice. KO mice different from WT mice, \* $P < 0.05$ , \*\* $P < 0.01$ ; WT and KO PF mice different from KO ad lib mice, † $P < 0.01$ .

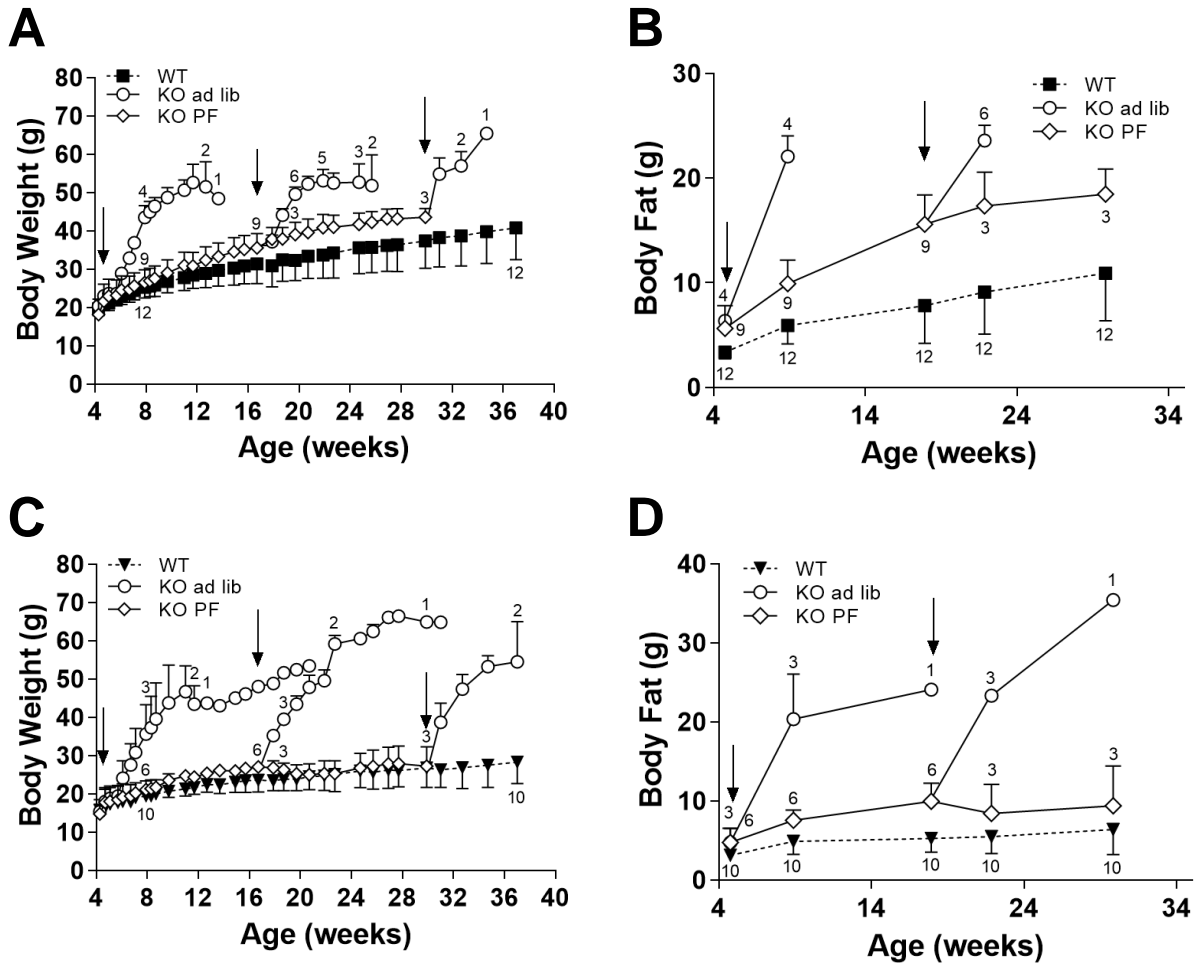

**Supplementary Figure 2. The obesity of *Ksr2* KO mice results from increased energy intake and decreased energy expenditure.** Male mice: 13 KO mice and 12 WT littermates were weaned onto chow diet. WT mice were fed ad lib throughout the study. At weaning, 4 KO mice were fed ad lib and 9 KO mice were pair-fed (PF) to the WT mice. At 17 weeks, 6 PF KO mice were switched to ad lib feeding, and at 30 weeks all remaining KO mice were switched to ad lib feeding. **A) Body weights**, and **B) Body fat in grams (g) by QMR**, were measured frequently during the study. Female mice: 9 KO mice and 10 WT littermates were weaned onto chow diet. WT mice were fed ad libitum (ad lib) throughout the study. At weaning, 3 KO mice were fed ad lib and 6 KO mice were pair-fed (PF) to the WT mice. At 17 weeks, 3 PF KO mice were switched to ad lib feeding, and at 30 weeks all remaining KO mice were switched to ad lib feeding. **C) Body weights**, and **D) Body fat in grams (g) by QMR**, were measured frequently during the study. For all panels, arrows indicate when feeding schedules were changed, and the numbers above the KO mouse groups and below the WT mouse group indicate the number of surviving mice in that group.

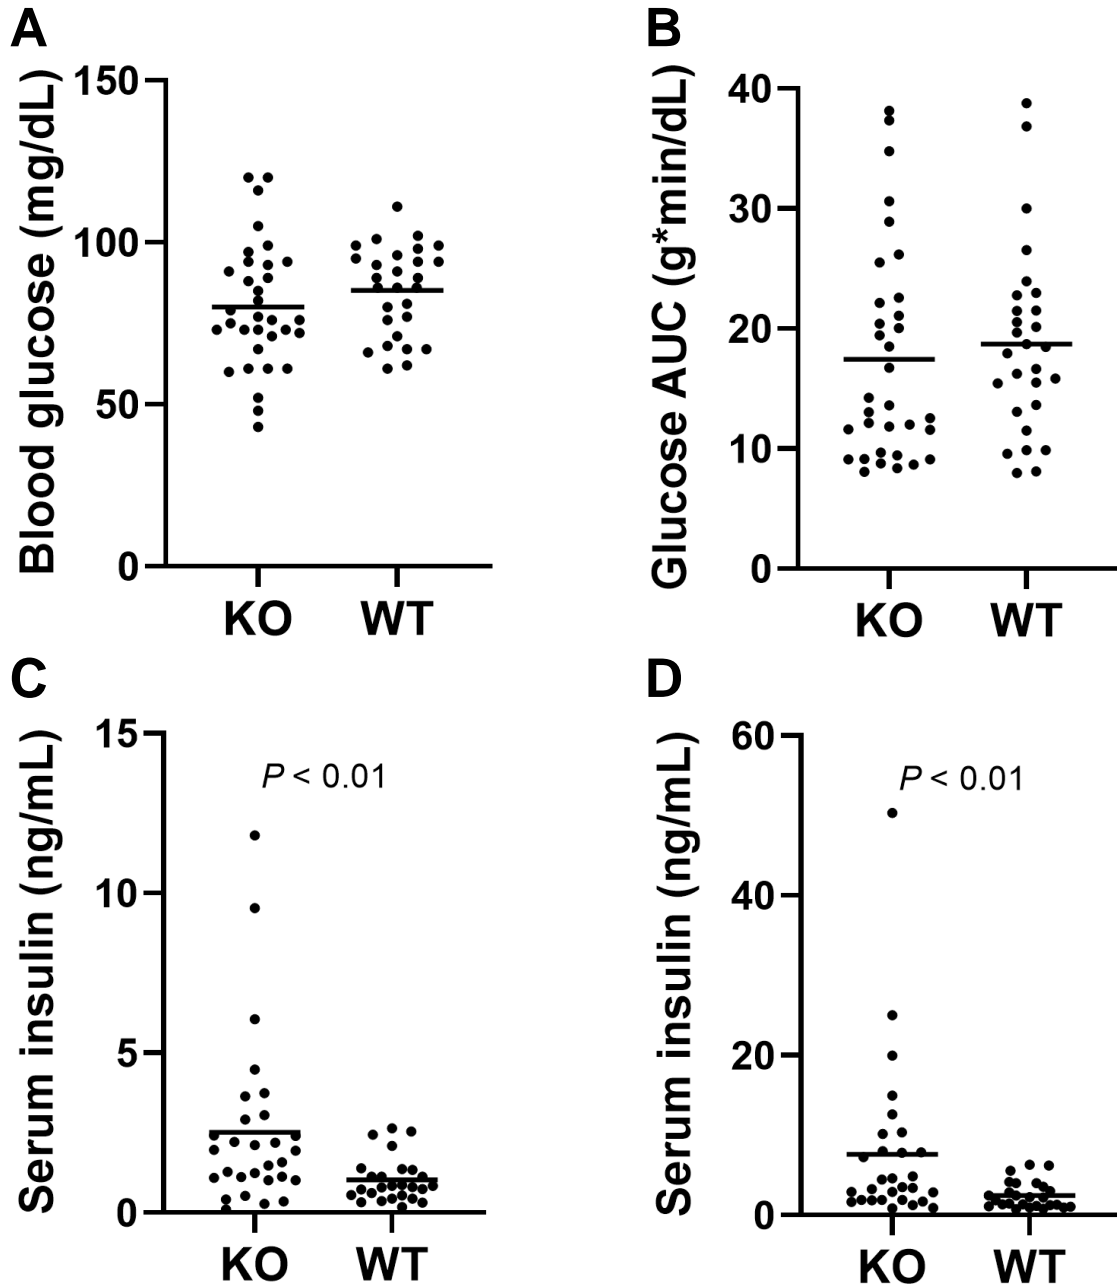

**Supplementary Figure 3. Impaired glucose homeostasis in adult male *Dpp8* Knockout mice.** OGTT levels of **A) fasting blood glucose at baseline** and **B) OGTT AUC** in 33 knockout (KO) and 28 wild-type (WT) mice. In these same OGTTs, **insulin levels at C) baseline** (predose; T = 0 minutes) and **D) 30 minutes** in 29 KO and 26 WT mice.

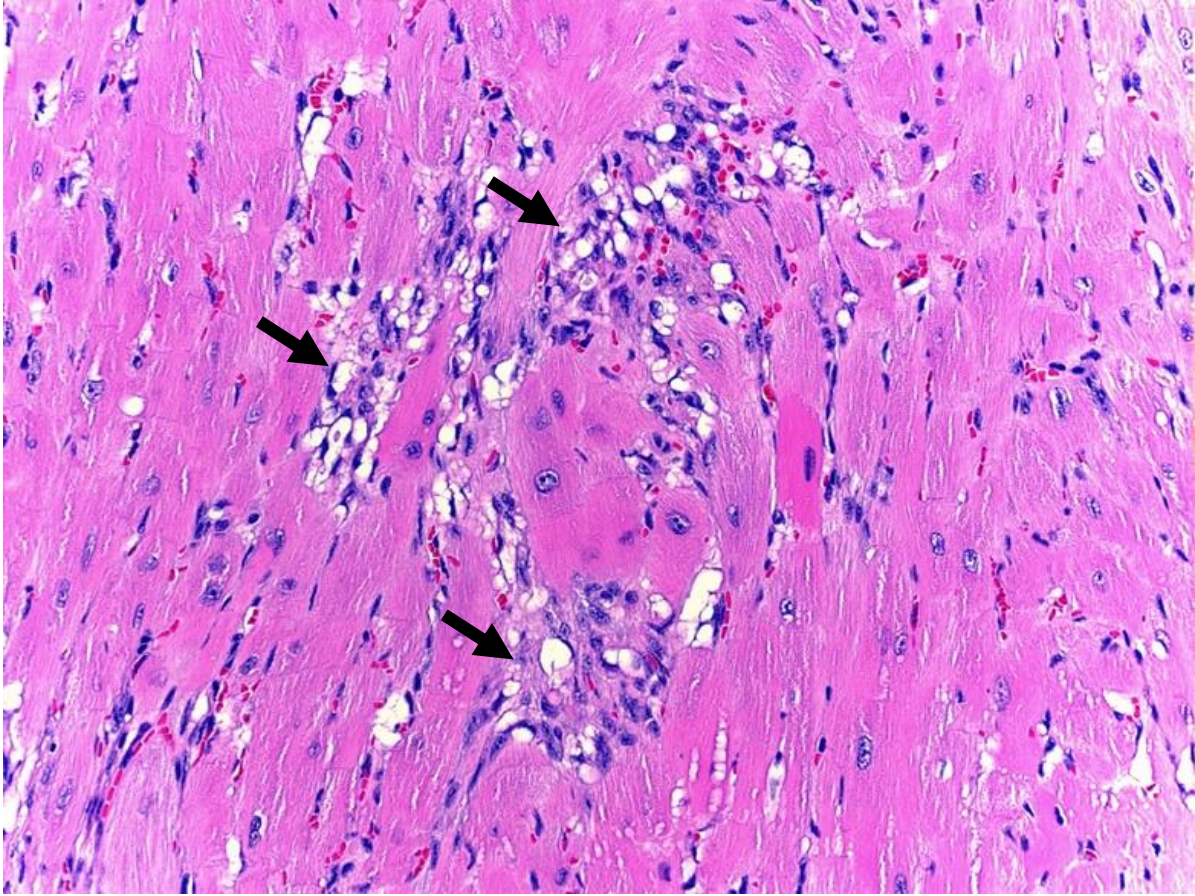

**Supplementary Figure 4. Myocardial lesions in *Aqp7* Knockout mice.** Interstitial infiltrates of vacuolated macrophages are associated with scattered small foci of myocardial degeneration (arrows).

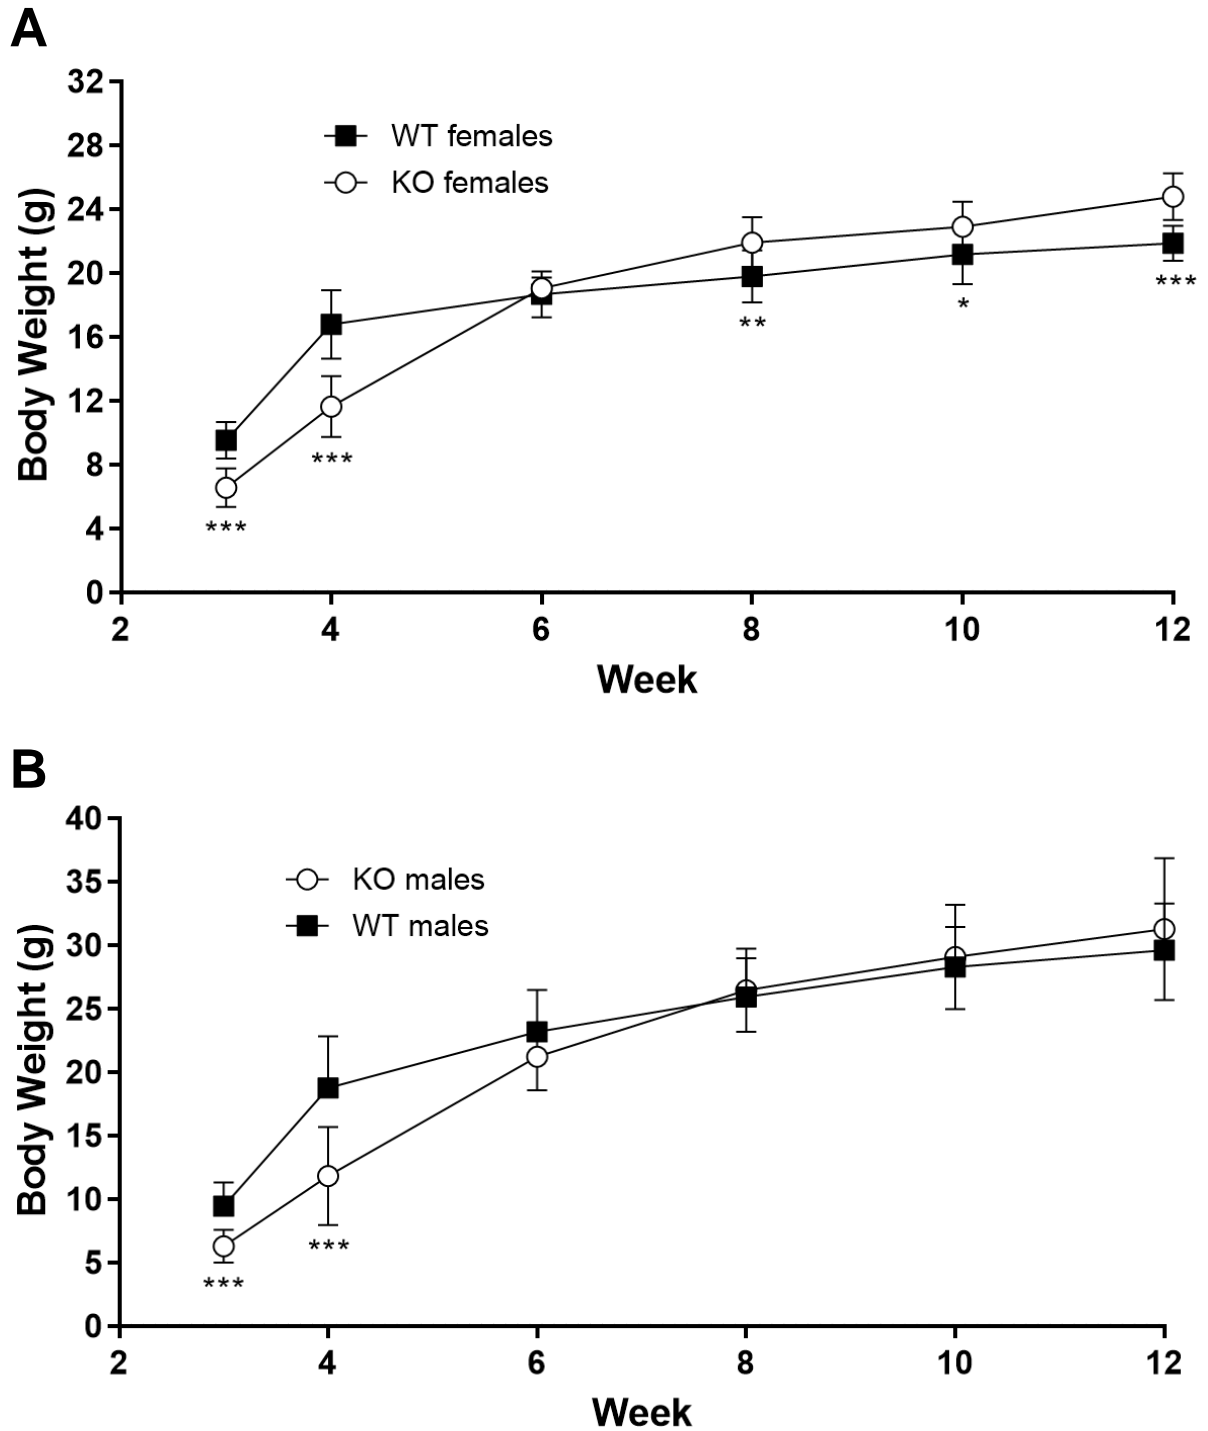

**Supplementary Figure 5. Body weights of young *Tle4* knockout (KO) and wild-type (WT) littermate mice.** Body weights were measured at multiple time points between weaning and 12 weeks of age for **A) female mice** (8 KO, 16 WT) and **B) male mice** (6 KO, 9 WT). KO mice different from WT mice, \* $P < 0.05$ , \*\* $P < 0.01$ , \*\*\* $P < 0.001$ .

**Supplementary Table 1. List of 75 mouse genes knocked out**

| <b>Gene symbol</b>                | <b>Official gene name</b>                                                                      | <b>Taconic catalog<sup>a</sup></b> |
|-----------------------------------|------------------------------------------------------------------------------------------------|------------------------------------|
| <i>Adamts4</i>                    | A disintegrin-like and metallopeptidase (reprolysin type) with thrombospondin type 1 motif, 4  | TF0170                             |
| <i>Adamts18</i>                   | A disintegrin-like and metallopeptidase (reprolysin type) with thrombospondin type 1 motif, 18 | TF3156                             |
| <i>Adcy3</i>                      | Adenylate cyclase 3                                                                            | TF0019                             |
| <i>Adm2</i>                       | Adrenomedullin 2                                                                               | TF4022                             |
| <i>Ak5</i>                        | Adenylate kinase 5                                                                             | TF2909                             |
| <i>Ankk1</i>                      | Ankyrin repeat and kinase domain containing 1                                                  | TF2000                             |
| <i>Aoc3</i>                       | Amine oxidase, copper containing 3                                                             | TF0957                             |
| <i>Apln</i>                       | Apelin                                                                                         | TF3533                             |
| <i>Aqp7</i>                       | Aquaporin 7                                                                                    | TF0023                             |
| <i>AU040320</i>                   | Expressed sequence AUO40320                                                                    | NL                                 |
| <i>Asnsd1</i>                     | Asparagine synthetase domain containing 1                                                      | TF1796                             |
| <i>Brs3</i>                       | Bombesin-like receptor 3                                                                       | TF1854                             |
| <i>Ccn5</i>                       | Cellular communication network factor 5                                                        | TF3923                             |
| <i>Cxxc4</i>                      | CXXC finger 4                                                                                  | TF0303                             |
| <i>Ddah1</i>                      | Dimethylarginine dimethylaminohydrolase 1                                                      | TF1669                             |
| <i>Dgkg</i>                       | Diacylglycerol kinase, 11                                                                      | TF1946                             |
| <i>Dpp8</i>                       | Dipeptidylpeptidase 8                                                                          | TF1778                             |
| <i>Enox1</i>                      | Ecto-NOX disulfide-thiol exchanger 1                                                           | TF2961                             |
| <i>Ffar4</i><br>( <i>Gpr120</i> ) | Free fatty acid receptor 4                                                                     | TF0224                             |
| <i>G2e3</i>                       | G2/M-phase specific E3 ubiquitin ligase                                                        | NL                                 |
| <i>Glrx2</i>                      | Glutaredoxin 2 (thioltransferase)                                                              | NL                                 |
| <i>Gpr45</i>                      | G protein-coupled receptor 45                                                                  | NL                                 |
| <i>Gpr61</i>                      | G protein-coupled receptor 61                                                                  | TF2683                             |
| <i>Gpx7</i>                       | Glutathione peroxidase 7                                                                       | TF3532                             |
| <i>Hdac5</i>                      | Histone deacetylase 5                                                                          | TF2997                             |

Table is continued on the next page

|               |                                                                                   |        |
|---------------|-----------------------------------------------------------------------------------|--------|
| <i>Hdac6</i>  | Histone deacetylase 6                                                             | TF2765 |
| <i>Herc1</i>  | HECT and RLD domain containing E3 ubiquitin ligase protein ligase family member 1 | TF1657 |
| <i>Htr2c</i>  | 5-hydroxytryptamine (serotonin) receptor 2C                                       | TF1240 |
| <i>Igdcc4</i> | Immunoglobulin superfamily, DCC subclass, member 4                                | TF3828 |
| <i>Igfbp2</i> | Insulin-like growth factor binding protein 2                                      | TF0321 |
| <i>Itih1</i>  | Inter-alpha trypsin inhibitor, heavy chain 1                                      | TF1059 |
| <i>Kdm3a</i>  | Lysine demethylase 3A                                                             | NL     |
| <i>Kiss1</i>  | KiSS-1 metastasis-suppressor                                                      | TF3885 |
| <i>Kiss1r</i> | KiSS-1 receptor                                                                   | TF1853 |
| <i>Ksr2</i>   | Kinase suppressor of ras 2                                                        | TF3052 |
| <i>Lrn2</i>   | Leucine rich repeat protein 2, neuronal                                           | TF3414 |
| <i>Lrrtm1</i> | Leucine rich repeat transmembrane neuronal 1                                      | TF3653 |
| <i>Mc3r</i>   | Melanocortin 3 receptor                                                           | TF0402 |
| <i>Mc4r</i>   | Melanocortin 4 receptor                                                           | TF2556 |
| <i>Mfap3l</i> | Microfibrillar-associated protein 3-like                                          | TF3906 |
| <i>Ncoa1</i>  | Nuclear receptor coactivator 1                                                    | TF1666 |
| <i>Ncs1</i>   | Neuronal calcium sensor 1                                                         | TF0217 |
| <i>Npvf</i>   | Neuropeptide VF precursor                                                         | TF2353 |
| <i>Nr4a1</i>  | Nuclear receptor subfamily 4, group A, member 1                                   | TF1559 |
| <i>Ntm</i>    | Neurotrimin                                                                       | TF3441 |
| <i>Oprm1</i>  | Opioid receptor, mu 1                                                             | NL     |
| <i>P2rx6</i>  | Purinergic receptor P2X, ligand-gated ion channel, 6                              | TF0515 |
| <i>Pecr</i>   | Peroxisomal trans-2-enoyl-CoA reductase                                           | TF0959 |
| <i>Pnpla2</i> | Patatin-like phospholipase domain containing 2                                    | NL     |
| <i>Prdx6</i>  | Peroxiredoxin 6                                                                   | TF1709 |
| <i>Prlhr</i>  | Prolactin releasing hormone receptor                                              | TF1878 |
| <i>Prmt7</i>  | Protein arginine N-methyltransferase 7                                            | TF2986 |
| <i>Prok2</i>  | Prokineticin 2                                                                    | TF3969 |

Table is continued on the next page



|                      |                                                                             |        |
|----------------------|-----------------------------------------------------------------------------|--------|
| <i>Prokr2</i>        | Prokineticin receptor 2                                                     | TF3011 |
| <i>Ptp4a1</i>        | Protein tyrosine phosphatase 4a1                                            | NL     |
| <i>Ptprn</i>         | Protein tyrosine phosphatase, receptor type, N                              | TF0601 |
| <i>Pyy</i>           | Peptide YY                                                                  | TF3812 |
| <i>Resp18</i>        | Regulated endocrine-specific protein 18                                     | TF4045 |
| <i>Retn</i>          | Resistin                                                                    | TF3517 |
| <i>Retsat</i>        | Retinol saturase (all trans retinol 13,14 reductase)                        | TF3526 |
| <i>Rgs10</i>         | Regulator of G-protein signalling 10                                        | TF0059 |
| <i>Scg3</i>          | Secretogranin III                                                           | TF3191 |
| <i>Sik2</i>          | Salt inducible kinase 2                                                     | TF2778 |
| <i>Slc6a4 (Sert)</i> | Solute carrier family 6 (neurotransmitter transporter, serotonin), member 4 | TF2861 |
| <i>Sost</i>          | Sclerostin                                                                  | TF3444 |
| <i>Srpk2</i>         | Serine/arginine rich protein specific kinase 2                              | TF1921 |
| <i>St3gal2</i>       | ST3 beta-galactoside alpha-2,3-sialyltransferase 2                          | TF2992 |
| <i>Tenm3</i>         | Teneurin transmembrane protein 3                                            | TF3824 |
| <i>Tle4</i>          | Transducin-like enhancer of split 4                                         | TF2902 |
| <i>Tnfsf13b</i>      | TNF superfamily member 13b                                                  | TF0903 |
| <i>Tsn</i>           | Translin                                                                    | TF0827 |
| <i>Tusc3</i>         | Tumor suppressor candidate 3                                                | TF2125 |
| <i>Usp13</i>         | Ubiquitin specific peptidase 13 (isopeptidase T-3)                          | TF2533 |
| <i>Usp38</i>         | Ubiquitin specific peptidase 38                                             | TF2838 |
| <i>Wnt8b</i>         | Wingless-type MMTV integration site family, member 8B                       | TF3868 |

**Abbreviations:** NL, not listed

<sup>a</sup>More information available at the Taconic Biosciences webpage: <https://www.taconic.com/find-your-model/>

**Supplementary Table 2. Mouse gene KO lines generated by homologous recombination (N=38)**

| <b>Mouse Gene</b> | <b>Protein class</b>       | <b>Mouse chromosome</b> | <b>Site of deletion</b> | <b>NCBI Reference Sequence</b> |
|-------------------|----------------------------|-------------------------|-------------------------|--------------------------------|
| <i>Adamts4</i>    | Enzyme                     | 1                       | Coding exon 4           | NM_172845                      |
| <i>Adamts18</i>   | Enzyme                     | 8                       | Coding exons 1-3        | NM_172466                      |
| <i>Adm2</i>       | Secreted                   | 15                      | Both coding exons       | NM_182928                      |
| <i>Ak5</i>        | Enzyme                     | 3                       | Coding exons 3-5        | AK053807                       |
| <i>Ankk1</i>      | Enzyme                     | 9                       | Coding exons 1-5        | NM_172922                      |
| <i>Apln</i>       | Secreted                   | X                       | Both coding exons       | NM_013912                      |
| <i>Aqp7</i>       | Transporter                | 4                       | Coding exon 1           | NM_007473                      |
| <i>AU040320</i>   | Secreted                   | 4                       | Coding exon 2           | NM_001035525                   |
| <i>Ccn5</i>       | Secreted                   | 2                       | Coding exons 2-3        | NM_016873                      |
| <i>Cxxc4</i>      | Intracellular zinc finger  | 3                       | Coding exon 1           | NM_001004367                   |
| <i>Dgkg</i>       | Enzyme                     | 16                      | Coding exons 3-4        | NM_138650                      |
| <i>Dpp8</i>       | Enzyme                     | 9                       | Last 6 coding exons     | NM_028906                      |
| <i>Gpr45</i>      | G protein-coupled receptor | 1                       | Single coding exon      | AF139642                       |
| <i>Gpr61</i>      | G protein-coupled receptor | 3                       | Single coding exon      | NM_175470                      |
| <i>Gpx7</i>       | Enzyme                     | 4                       | Coding exons 2-3        | NM_024198                      |
| <i>Itih1</i>      | Secreted                   | 14                      | Coding exons 1-6        | NM_008406                      |
| <i>Lrrn2</i>      | Membrane protein           | 1                       | Single coding exon      | NM_010732                      |
| <i>Lrrtm1</i>     | Membrane protein           | 6                       | Single coding exon      | NM_028880                      |
| <i>Mfap3l</i>     | Enzyme                     | 8                       | Last coding exon        | NM_027756                      |
| <i>Ncs1</i>       | Calcium binding protein    | 2                       | Coding exon 1           | NM_019681                      |
| <i>Npvf</i>       | Secreted                   | 6                       | Coding exons 1-2        | NM_021892                      |
| <i>Ntm</i>        | Cell adhesion              | 9                       | Coding exon 1           | BC023307                       |
| <i>Oprm1</i>      | G protein-coupled receptor | 10                      | Coding exon 2           | NM_001039652                   |
| <i>P2rx6</i>      | Channel                    | 16                      | Coding exons 1-2        | NM_011028                      |
| <i>Pnpla2</i>     | Enzyme                     | 7                       | Coding exons 2-4        | NM_025802                      |
| <i>Prok2</i>      | Secreted                   | 6                       | Coding exons 1-2        | NM_015768                      |

Table is continued on the next page

|                 |                            |    |                            |              |
|-----------------|----------------------------|----|----------------------------|--------------|
| <i>Prokr2</i>   | G-protein coupled receptor | 2  | Coding exon 1              | NM_144944    |
| <i>Ptprn</i>    | Membrane protein           | 1  | Last 8 coding exons        | NM_008985    |
| <i>Pyy</i>      | Secreted                   | 11 | All 3 coding exons         | NM_145435    |
| <i>Resp18</i>   | Secreted                   | 1  | Coding exons 2-5           | NM_009049    |
| <i>Retn</i>     | Secreted                   | 8  | Coding exons 1-2           | NM_022984    |
| <i>Retsat</i>   | Enzyme                     | 6  | Coding exons 1-4           | AF466400     |
| <i>Scg3</i>     | Secreted                   | 9  | Coding exons 1-4           | NM_009130    |
| <i>Sik2</i>     | Enzyme                     | 9  | Coding exons 2-3           | NM_178710    |
| <i>Tnfsf13b</i> | Secreted                   | 8  | Coding exon 1              | NM_033622    |
| <i>Usp13</i>    | Enzyme                     | 3  | Coding exon 8              | NM_001013024 |
| <i>Usp38</i>    | Enzyme                     | 8  | Second to last coding exon | NM_027554    |
| <i>Wnt8b</i>    | Secreted                   | 19 | Coding exons 3-6           | NM_011720    |

**Abbreviations:** KO, knockout; N, number of KO lines; NCBI, National Center for Biotechnology Information

**Supplementary Table 3. Mouse gene KO lines generated by gene trapping (N=24)**

| Mouse gene     | Protein class                | Omnibank sequence tag | Mouse Chr | Insertion site                         | NCBI reference sequence |
|----------------|------------------------------|-----------------------|-----------|----------------------------------------|-------------------------|
| <i>Adamts4</i> | Enzyme                       | 106997                | 1         | Intron between coding exons 1 & 2      | NM_172845               |
| <i>Adcy3</i>   | Enzyme                       | 68174                 | 12        | Intron between coding exons 2 & 3      | NM_138305               |
| <i>Aoc3</i>    | Enzyme                       | 179698                | 11        | Intron between coding exons 1 & 2      | NM_009675.1             |
| <i>Ddah1</i>   | Enzyme                       | 7734                  | 3         | Intron between coding exons 1 & 2      | NM_026993.1             |
| <i>Enox1</i>   | Enzyme                       | GST_3658_B3           | 14        | Intron between coding exons 1 & 2      | NM_172813               |
| <i>Glx2</i>    | Enzyme                       | 108649                | 1         | Intron between coding exons 1 & 2      | NM_023505.1             |
| <i>Hdac6</i>   | Enzyme                       | 244126                | X         | 5' noncoding                           | BC041105.1              |
| <i>Herc1</i>   | Enzyme                       | 443596                | 9         | 5' noncoding                           | AK083823                |
| <i>Igdcc4</i>  | Membrane protein             | 244907                | 9         | Intron between coding exons 1 & 2      | NM_020043               |
| <i>Igfbp2</i>  | Secreted                     | 365171                | 1         | Intron between coding exons 1 & 2      | NM_008342               |
| <i>Kdm3a</i>   | Enzyme                       | 227748                | 6         | Intron between coding exons 8 & 9      | AU035888                |
| <i>Ncoa1</i>   | Nuclear receptor coactivator | 455417                | 12        | 5' noncoding                           | NM_010881.1             |
| <i>Nr4a1</i>   | Nuclear receptor             | GST_5707_C8           | 15        | 5' noncoding                           | NM_010444               |
| <i>Pecr</i>    | Enzyme                       | 63826                 | 1         | Intron between coding exons 1 & 2      | NM_023523               |
| <i>Prdx6</i>   | Enzyme                       | 519147                | 1         | Intron between coding exons 2 & 3      | NM_007453               |
| <i>Prmt7</i>   | Enzyme                       | 415307                | 8         | 5' noncoding                           | NM_145404               |
| <i>Ptp4a1</i>  | Enzyme                       | 165257                | 1         | 5' noncoding                           | BC031734.1              |
| <i>Rgs10</i>   | GTPase activator             | 24334                 | 7         | Intron between coding exons 3 & 4      | NM_026418               |
| <i>Scg3</i>    | Secreted                     | 17542                 | 9         | Intron between the last 2 coding exons | NM_009130               |
| <i>Srpk2</i>   | Enzyme                       | 464130                | 5         | Intron between coding exons 1 & 2      | NM_009274               |
| <i>St3gal2</i> | Enzyme                       | 213584                | 8         | 5' noncoding                           | NM_178048               |

Table is continued on the next page

|              |                           |       |    |                                                 |             |
|--------------|---------------------------|-------|----|-------------------------------------------------|-------------|
| <i>Tenm3</i> | Membrane protein          | 99683 | 8  | Intron between coding exons 1 & 2               | NM_011857   |
| <i>Tle4</i>  | Transcription corepressor | 19477 | 19 | Intron between coding exons 10 & 11 from 3' end | NM_011600.2 |
| <i>Tusc3</i> | Enzyme subunit            | 24273 | 8  | Intron between coding exons 3 & 4 from 3' end   | NM_030254.2 |

**Abbreviations:** KO, knockout; N, number of KO lines; Chr, chromosome; NCBI, National Center for Biotechnology Information; GTPase, guanosine triphosphatase

**Supplementary Table 4. Body composition of *Mc3r* KO, *Mc4r* KO and *Mc3r/Mc4r* DKO mice**

| <b>Genotype (n)</b>       | <b>Body fat (g)</b> | <b>Lean body mass (g)</b> |
|---------------------------|---------------------|---------------------------|
| WT (12)                   | 8 ± 4               | 26 ± 2                    |
| <i>Mc3r</i> KO (14)       | 14 ± 3              | 25 ± 4                    |
| <i>Mc4r</i> KO (12)       | 23 ± 5              | 37 ± 3                    |
| <i>Mc3r/Mc4r</i> DKO (12) | 30 ± 7              | 34 ± 4                    |
|                           |                     |                           |
| <b>Two-way ANOVA</b>      | <b>P value</b>      | <b>P value</b>            |
| <i>Mc3r</i> KO vs WT      | <0.0001             | 0.074                     |
| <i>Mc4r</i> KO vs WT      | <0.0001             | <0.0001                   |
| Interaction               | 0.928               | 0.165                     |

**Notes:** Data are from 20-week-old mice fed HFD from weaning

**Abbreviations:** n, number of mice; g, grams; WT, wild-type; KO, knockout; DKO, double knockout; ANOVA, analysis of variance

**Supplementary Table 5. Body composition of *Gpr45* KO and WT mice**

| Diet | Age        | Sex    | Genotype (n) | Body fat (g)    | % body fat     | LBM (g)      |
|------|------------|--------|--------------|-----------------|----------------|--------------|
| Chow | 3 weeks    | Male   | WT (7)       | 2.19 ± 0.37     | 14.5 ± 1.8     | 12.9 ± 1.6   |
|      |            |        | KO (13)      | 2.92 ± 0.45**   | 19.4 ± 1.9***  | 12.1 ± 1.2   |
|      |            | Female | WT (5)       | 2.23 ± 0.54     | 15.8 ± 2.5     | 11.7 ± 0.9   |
|      |            |        | KO (9)       | 2.71 ± 0.32     | 19.1 ± 1.3**   | 11.5 ± 1.2   |
|      | 7-38 weeks | Male   | WT (40)      | 5.5 ± 3.8       | 16.4 ± 7.5     | 25.9 ± 3.5   |
|      |            |        | KO (49)      | 12.4 ± 5.4*** † | 32.2 ± 8.3***  | 24.4 ± 4.1   |
|      |            | Female | WT (36)      | 4.8 ± 2.8       | 19.4 ± 6.5     | 18.3 ± 2.7   |
|      |            |        | KO (51)      | 15.7 ± 6.4*** † | 42.7 ± 6.8***  | 19.8 ± 3.9   |
|      | 57 weeks   | Male   | WT (19)      | 9.2 ± 4.7       | 21.6 ± 7.5     | 31.4 ± 3.3   |
|      |            |        | KO (17)      | 25.9 ± 5.9***   | 42.1 ± 5.5***  | 35.1 ± 3.1** |
|      |            | Female | WT (16)      | 9.9 ± 4.2       | 29.2 ± 8.1     | 22.8 ± 2.1   |
|      |            |        | KO (18)      | 28.4 ± 8.6*** † | 51.2 ± 9.1***  | 25.6 ± 2.8** |
|      | 87 weeks   | Female | WT (15)      | 8.1 ± 4.8       | 24.2 ± 9.8     | 23.3 ± 2.4   |
|      |            |        | KO (10)      | 29.8 ± 14*** †  | 51.4 ± 12.9*** | 24.8 ± 2.1   |
| HFD  | 14 weeks   | Male   | WT (10)      | 12.2 ± 2.9      | 32.3 ± 6.1     | 25.2 ± 1.5   |
|      |            |        | KO (13)      | 18.9 ± 1.7***   | 40.2 ± 2.3***† | 28.1 ± 2.2** |
|      |            | Female | WT (7)       | 7.3 ± 3.6       | 26.6 ± 9.2     | 19.1 ± 1.5   |
|      |            |        | KO (5)       | 21.8 ± 3.2***   | 49 ± 1.6***†   | 22.7 ± 3**   |

**Notes:** KO mice different from WT mice, \*\* $P < 0.01$ ; \*\*\* $P < 0.001$ ; † Statistical analysis by Mann–Whitney test.

**Abbreviations:** HFD, high fat diet; (g), grams; KO, knockout; WT, wild-type; n, number of mice; LBM, lean body mass

**Supplementary Table 6. Metabolic parameters measured in *Gpr45* KO and WT mice**

| Assay                           |                                                  | Sex           | Age         | Genotype (n)     | Mean ± SD      |
|---------------------------------|--------------------------------------------------|---------------|-------------|------------------|----------------|
| OGTT                            | Glucose area under the curve (mg*min/dL)         | Male & female | 37-39 weeks | WT (30)          | 13,596 ± 3,976 |
|                                 |                                                  |               |             | KO (30)          | 11,591 ± 4,151 |
|                                 | Fasting blood glucose (mg/dL)                    | Male & female | 37-39 weeks | WT (30)          | 86 ± 24        |
|                                 |                                                  |               |             | KO (30)          | 93 ± 22        |
|                                 | Fasting serum insulin (ng/mL)                    | Male & female | 37-39 weeks | WT (29)          | 0.87 ± 1.22    |
|                                 |                                                  |               |             | KO (30)          | 2.56 ± 0.87*** |
|                                 | 30' serum insulin (ng/mL)                        | Male & female | 37-39 weeks | WT (30)          | 2.33 ± 3.33    |
|                                 |                                                  |               |             | KO (30)          | 6.61 ± 4.17*** |
|                                 | Composite Insulin Sensitivity Index <sup>a</sup> | Male & female | 37-39 weeks | WT (29)          | 11.9 ± 16.4    |
|                                 |                                                  |               |             | KO (30)          | 1.2 ± 1.0****† |
|                                 | HOMA Insulin Sensitivity Index <sup>b</sup>      | Male & female | 37-39 weeks | WT (29)          | 38.7 ± 61.7    |
|                                 |                                                  |               |             | KO (30)          | 2.7 ± 2.6****† |
| Serum leptin (ng/mL)            | Male & female                                    | 20 weeks      | WT (6)      | 8.7 ± 4.5        |                |
|                                 |                                                  |               | KO (12)     | 44.1 ± 16.7****† |                |
| Serum total cholesterol (mg/dL) | Male & female                                    | 14 weeks      | WT (6)      | 122 ± 27         |                |
|                                 |                                                  |               | KO (14)     | 159 ± 26*        |                |
| Serum triglycerides (mg/dL)     | Male & female                                    | 14 weeks      | WT (6)      | 84 ± 27          |                |
|                                 |                                                  |               | KO (14)     | 142 ± 51*        |                |

**Notes:** KO mice different from WT mice, \* $P < 0.05$ ; \*\*\* $P < 0.001$ ; † Statistical analysis by Mann–Whitney test.

**Abbreviations:** n, number of mice; SD, standard deviation; KO, knockout; WT, wild-type

<sup>a</sup>Higher values indicate increased insulin sensitivity. From: Matsuda M, DeFronzo RA. Insulin sensitivity indices obtained from oral glucose tolerance testing: comparison with the euglycemic insulin clamp. *Diabetes Care* 1999;22:1462-70. doi: 10.2337/diacare.22.9.1462.

<sup>b</sup>Higher values indicate increased insulin sensitivity. From: Turner RC, Holman RR, Matthews D, Hockaday TD, Peto J. Insulin deficiency and insulin resistance interaction in diabetes: estimation of their relative contribution by feedback analysis from basal plasma insulin and glucose concentrations. *Metabolism* 1979;28:1086-96. doi: 10.1016/0026-0495(79)90146-x.



**Supplementary Table 7. Physical activity and VO<sub>2</sub> measurements in *Gpr45* KO and WT mice**

| Assay              |                                                  | Sex           | Age         | Genotype (n)      | Mean ± SD                 |
|--------------------|--------------------------------------------------|---------------|-------------|-------------------|---------------------------|
| Mini Mitter System | Normalized gross motor activity (%), light phase | Male          | 32-33 weeks | WT (6)<br>KO (12) | 100 ± 23<br>119 ± 25      |
|                    | Normalized gross motor activity (%), dark phase  | Male          | 32-33 weeks | WT (6)<br>KO (12) | 100 ± 51<br>83 ± 26       |
| Oxymax             | Ambulatory counts/hour                           | Male & female | 14-16 weeks | WT (8)<br>KO (16) | 6.4 ± 6.7<br>8.6 ± 8.7    |
|                    | VO <sub>2</sub> , mL/hour                        | Male & female | 14-16 weeks | WT (8)<br>KO (16) | 70.2 ± 10.8<br>78.4 ± 8.4 |

**Abbreviations:** n, number of mice; SD, standard deviation; KO, knockout; WT, wild-type; VO<sub>2</sub>, oxygen consumption

**Supplementary Table 8. Body composition of *Kiss1* and *Kiss1r* KO and WT mice**

| Gene          | Sex      | Genotype (n) | Normalized body weight | Normalized body fat (g) | Normalized % body fat | Normalized LBM (g) |
|---------------|----------|--------------|------------------------|-------------------------|-----------------------|--------------------|
| <i>Kiss1</i>  | Male     | WT (12)      | 100 ± 13               | 100 ± 46                | 100 ± 34              | 100 ± 4            |
|               |          | KO (17)      | 94 ± 15                | 125 ± 41                | 134 ± 32*             | 83 ± 7***          |
|               | Female   | WT (12)      | 100 ± 18               | 100 ± 41                | 100 ± 27              | 100 ± 9            |
|               |          | KO (12)      | 105 ± 21               | 123 ± 54                | 115 ± 28              | 100 ± 12           |
|               | Combined | WT (24)      | 100 ± 15               | 100 ± 43                | 100 ± 30              | 100 ± 7            |
|               |          | KO (27)      | 98 ± 18                | 124 ± 46*               | 127 ± 31**            | 90 ± 12***         |
| <i>Kiss1r</i> | Male     | WT (5)       | 100 ± 10               | 100 ± 13                | 100 ± 4               | 100 ± 10           |
|               |          | KO (7)       | 80 ± 11**              | 96 ± 25                 | 124 ± 27              | 75 ± 11**          |
|               | Female   | WT (8)       | 100 ± 6                | 100 ± 19                | 100 ± 17              | 100 ± 5            |
|               |          | KO (11)      | 112 ± 28               | 165 ± 72**              | 151 ± 32***           | 96 ± 17            |
|               | Combined | WT (13)      | 100 ± 8                | 100 ± 16                | 100 ± 13              | 100 ± 7            |
|               |          | KO (18)      | 99 ± 28                | 139 ± 67                | 140 ± 32***           | 88 ± 18*           |

**Notes:** KO mice different from WT mice, \* $P < 0.05$ ; \*\* $P < 0.01$ ; \*\*\* $P < 0.001$

**Abbreviations:** n, number of mice; g, grams; LBM, lean body mass; WT, wild-type; KO, knockout
